# Supplementary material for: Glacial Legacies: Microbial Communities of <em>Antarctic refugia</em>
Source: Preprints.org preprint supplement (doi:10.20944/preprints202209.0065.v1), 2022-09-05
Supplement: Supplementary file 3 [file Sup Table 4 - Environmental correlations.xlsx]

## Sheet: Sheet1
	P	K	OM	PH	EC	N	GW	Distance	Dataset
Elevation	-0.317347	-0.616473	-0.0230357	-0.563148	-0.236666	-0.094756	0.137862	0.802252	Full
	-0.762197	-0.438816	-0.515968	-0.659588	-0.125142	0.322368	0.566277	0.740385	Putative Refugia
	-0.465572	-0.853653	0.325039	-0.676965	-0.0998189	-0.0712428	-0.203281	0.488009	Glaciated Sites
	P	0.403842	-0.149218	0.497626	-0.292451	-0.282912	-0.301159	-0.0581965	Full
		0.441599	0.383956	0.373733	0.394599	0.158534	-0.104168	-0.206399	Putative Refugia
		0.531009	-0.294566	0.664895	-0.425305	-0.419683	-0.488153	-0.35434	Glaciated Sites
		K	-0.305634	0.553698	0.174269	0.142435	0.144945	-0.47434	Full
			-0.282178	0.434368	0.289184	0.33626	0.235512	-0.412998	Putative Refugia
			-0.369538	0.590586	0.0944099	0.0463497	0.0658741	-0.572698	Glaciated Sites
			OM	-0.184698	-0.163162	-0.113089	0.227252	-0.172554	Full
				0.243892	-0.466033	-0.600847	-0.597202	-0.365215	Putative Refugia
				-0.315108	-0.184111	-0.0866474	0.551043	-0.105387	Glaciated Sites
	Positively correlated:			PH	-0.347168	-0.394274	-0.280822	-0.376658	Full
	0.802252				-0.245832	-0.214206	-0.250249	-0.630104	Putative Refugia
					-0.474593	-0.516287	-0.350567	-0.114247	Glaciated Sites
	Negatively correlated:				EC	0.952583	0.316318	-0.113503	Full
	-0.853653					0.590888	0.298633	0.186665	Putative Refugia
						0.990602	0.39966	0.0911899	Glaciated Sites
	Darker colour shades indicate stronger correlation. Any values higher than 0.5 or lower than -0.5 were considered strongly correlated and excluded from fitting models together.					N	0.526014	0.00340203	Full
							0.926322	0.404316	Putative Refugia
							0.456158	0.0987485	Glaciated Sites
							GW	0.13563	Full
								0.502056	Putative Refugia
								-0.295866	Glaciated Sites
