# Supplementary material for: Glacial Legacies: Microbial Communities of <em>Antarctic refugia</em>
Source: Preprints.org preprint supplement (doi:10.20944/preprints202209.0065.v1), 2022-09-05
Supplement: Supplementary file 4 [file Sup Table 5 - ANCOM Site History.xlsx]

## Sheet: Sheet1
Taxon	Recently Disturbed					Putative Refugia					W	Reject null hypothesis
	0	25	50	75	100	0	25	50	75	100
d__Bacteria; p__Acidobacteriota; c__Blastocatellia; o__Pyrinomonadales; f__Pyrinomonadaceae; g__RB41	1	7	16	24	64	1	1	1	3	14	4711	TRUE
d__Bacteria; p__Gemmatimonadota; c__Gemmatimonadetes; o__Gemmatimonadales; f__Gemmatimonadaceae; g__uncultured; s__uncultured_Gemmatimonadetes	1	1	1	1	1	1	1	6.5	16.75	52	4681	TRUE
d__Bacteria; p__Acidobacteriota; c__Blastocatellia; o__Blastocatellales; f__Blastocatellaceae; g__Blastocatella	1	1	11	21	38	4	19	37	70.5	179	4639	TRUE
d__Bacteria; p__Bacteroidota; c__Bacteroidia; o__Chitinophagales; f__Chitinophagaceae; g__uncultured	1	2	6	10	22	1	11.75	18	47	172	4634	TRUE
d__Bacteria; p__Chloroflexi; c__Chloroflexia; o__Thermomicrobiales; f__JG30-KF-CM45; g__JG30-KF-CM45; s__uncultured_soil	1	1	1	1	17	1	1	7.5	16.5	55	4607	TRUE
d__Bacteria; p__Actinobacteriota; c__Thermoleophilia; o__Gaiellales; f__Gaiellaceae; g__Gaiella; s__uncultured_actinobacterium	1	1	1	1	7	1	1	1	26	160	4502	TRUE
d__Bacteria; p__Actinobacteriota; c__Thermoleophilia; o__Gaiellales; f__Gaiellaceae; g__Gaiella; s__uncultured_actinobacterium	1	1	1	1	5	1	1	2.5	9.75	52	4481	TRUE
d__Bacteria; p__Armatimonadota; c__Armatimonadia; o__Armatimonadales; f__Armatimonadales; g__Armatimonadales; s__uncultured_Armatimonadetes	1	1	1	1	5	1	1	1.5	13	76	4459	TRUE
d__Bacteria; p__Acidobacteriota; c__Blastocatellia; o__Pyrinomonadales; f__Pyrinomonadaceae; g__RB41	1	1	4	7	12	1	1	1	1	6	4455	TRUE
d__Bacteria; p__Chloroflexi; c__KD4-96; o__KD4-96; f__KD4-96; g__KD4-96	1	1	1	1	1	1	1	1	13	49	4394	TRUE
d__Bacteria; p__Myxococcota; c__Polyangia; o__Nannocystales; f__Nannocystaceae; g__Nannocystis	1	1	1	1	10	1	1	4.5	9.5	29	4372	TRUE
